# Supplementary figures and images for: Towards Understanding Non-Infectious Growth-Rate Retardation in Growing Pigs
Source: MDPI journal article supplement (doi:10.3390/proteomes7030031), 2019-09-11

Supplementary material figure S1

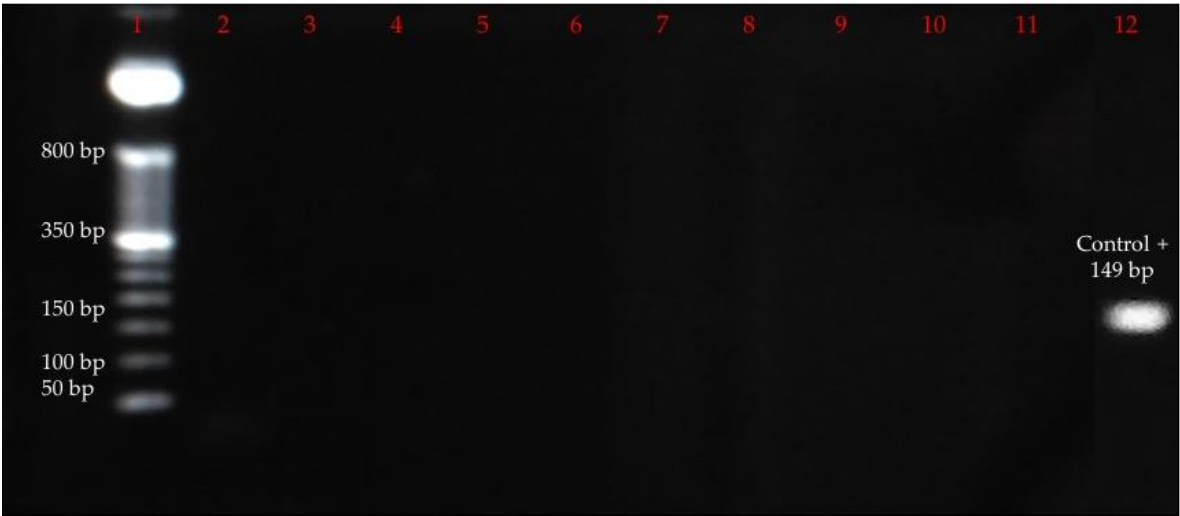

Supplementary material figure S2

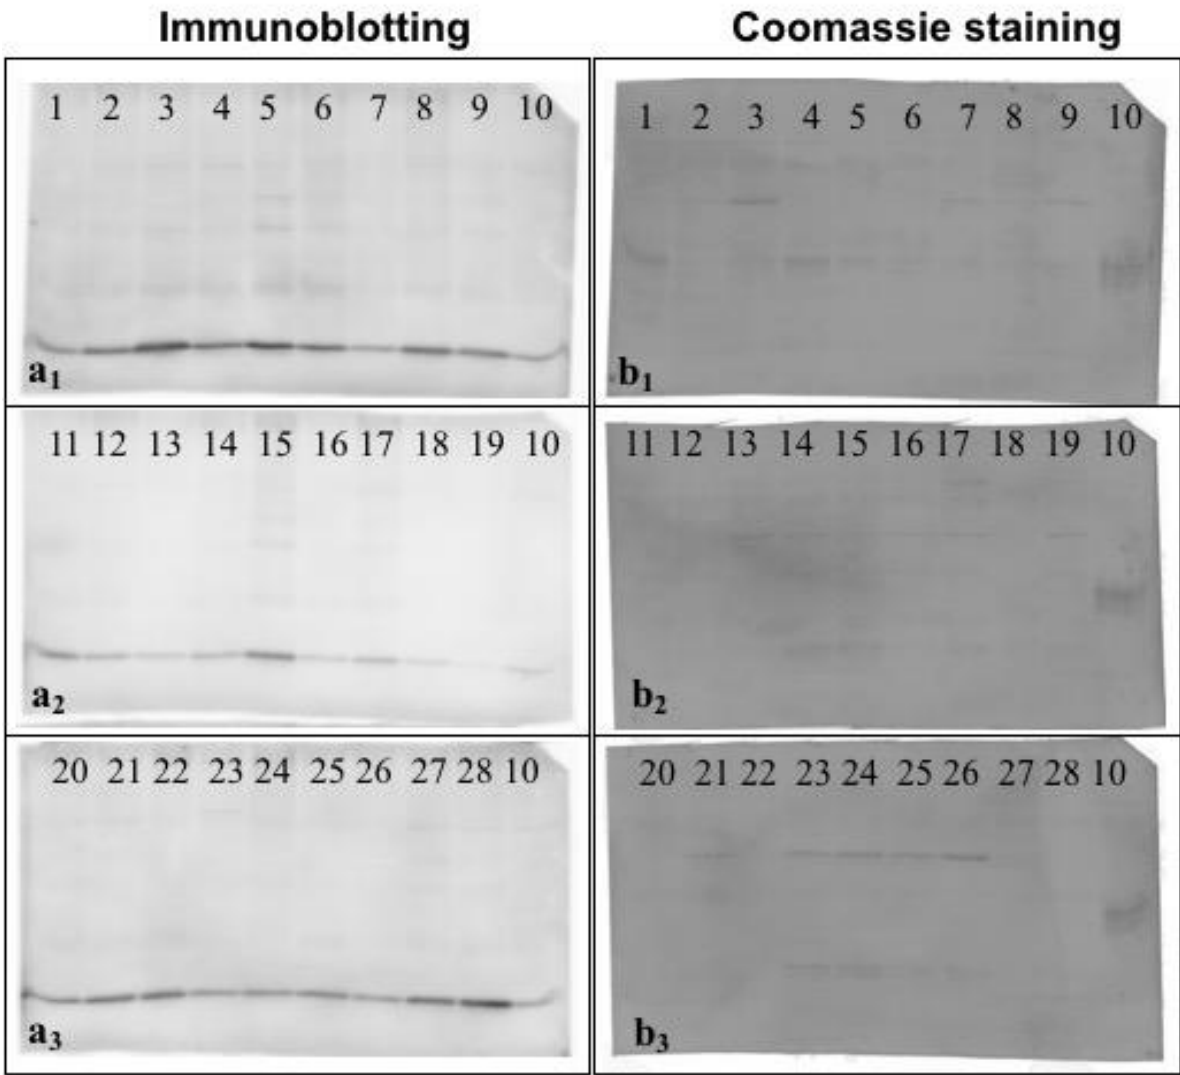

Supplement: s1 [file s1]
